# Supplementary material
Source: Springer Nature journal article supplement (https://www.springermedizin.de/resource/supplementary/12935_2008_199_MOESM3_ESM.pdf/9541296)

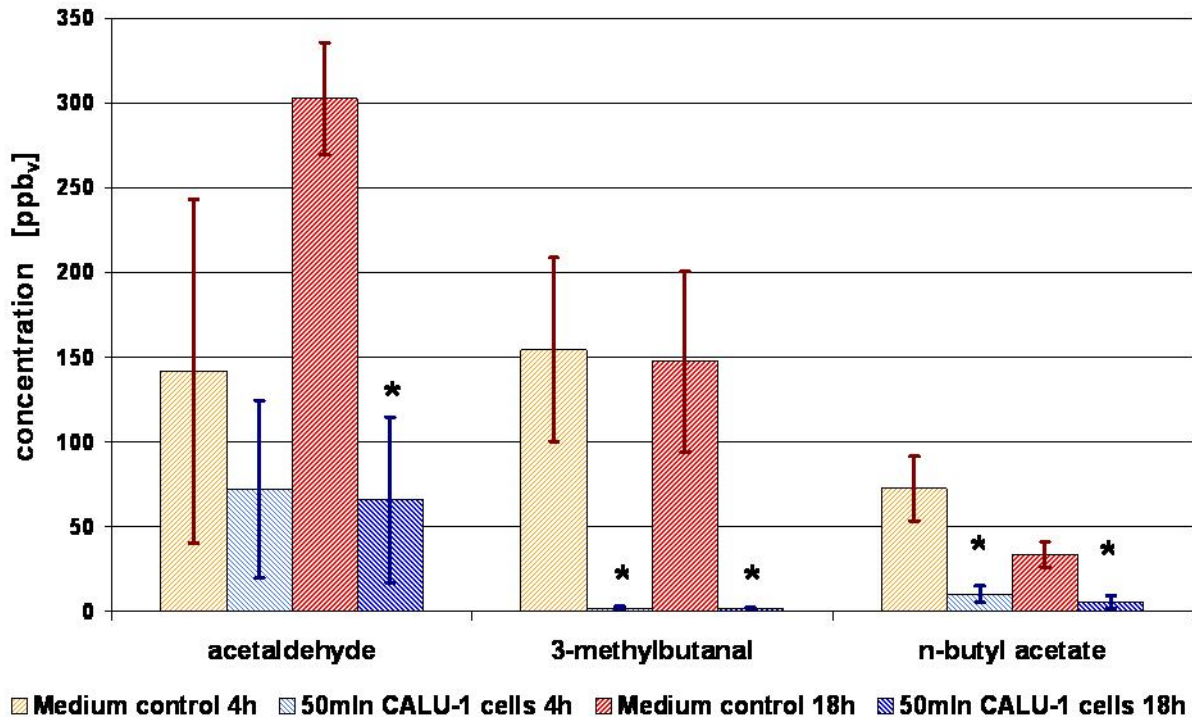

Supplement: MOESM3 [file 9541296]
